# Supplementary material
Source: PubMed Central journal article supplement (PMC3562777)
Supplement: 1207458110_pnas.201207458SI.pdf [file 1207458110_pnas.201207458SI.pdf]

# Supporting Information

Hosaka et al. 10.1073/pnas.1207458110

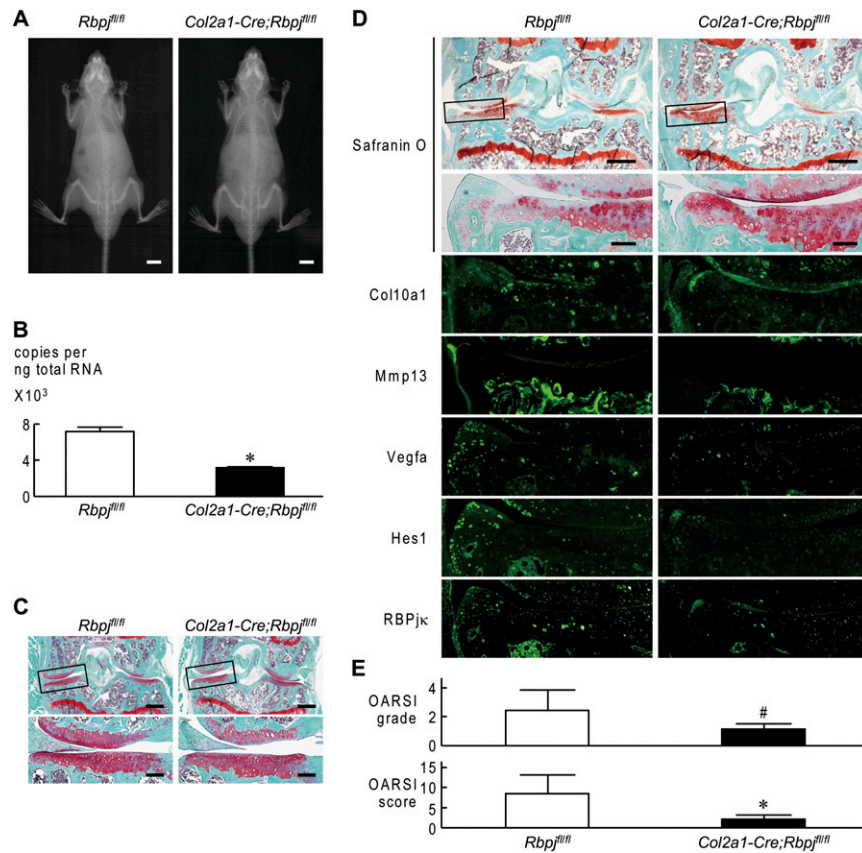

**Fig. S1.** Osteoarthritis (OA) development in a type II collagen (*Col2a1-Cre;Rbpj<sup>fl/fl</sup>*) mouse line, which survived after birth. (A) Plain radiographs of *Rbpj<sup>fl/fl</sup>* and *Col2a1-Cre;Rbpj<sup>fl/fl</sup>* littermates (8 wk old). (Scale bars, 10 mm.) (B) mRNA levels of *Rbpj* in articular chondrocytes from *Rbpj<sup>fl/fl</sup>* and *Col2a1-Cre;Rbpj<sup>fl/fl</sup>* littermates (6 d old). Data are expressed as means  $\pm$  SD \**P* < 0.01 versus *Rbpj<sup>fl/fl</sup>*. (C) Safranin O staining of mouse knee joints in 8-wk-old *Rbpj<sup>fl/fl</sup>* and *Col2a1-Cre;Rbpj<sup>fl/fl</sup>* littermates under physiological conditions. *Insets* in the *Upper* safranin O-stained images indicate the regions shown in the enlarged images (*Lower*). (Scale bars, 400  $\mu$ m and 100  $\mu$ m for low and high magnification images, respectively.) (D) Cartilage degradation assessed by safranin O staining and immunofluorescence with antibodies to Col10a1, Mmp13, Vegfa, Hes1, and RBPj $\kappa$  in mouse knee joints 8 wk after creating a surgical OA model in 8-wk-old *Rbpj<sup>fl/fl</sup>* and *Col2a1-Cre;Rbpj<sup>fl/fl</sup>* littermates. *Insets* in the *Upper* safranin O-stained image indicate the regions shown in the enlarged safranin O-stained or immunofluorescence images (*Lower*). (Scale bars, 400  $\mu$ m and 100  $\mu$ m for low and high magnification images, respectively.) (E) Quantification of OA development by Osteoarthritis Research Society International (OARSI) grading systems. Data are expressed as means  $\pm$  SD of seven mice per group. #*P* < 0.05, \**P* < 0.01 versus *Rbpj<sup>fl/fl</sup>*.
